# Supplementary material
Source: PubMed Central journal article supplement (PMC3641598)
Supplement: cr201336x1.pdf [file cr201336x1.pdf]

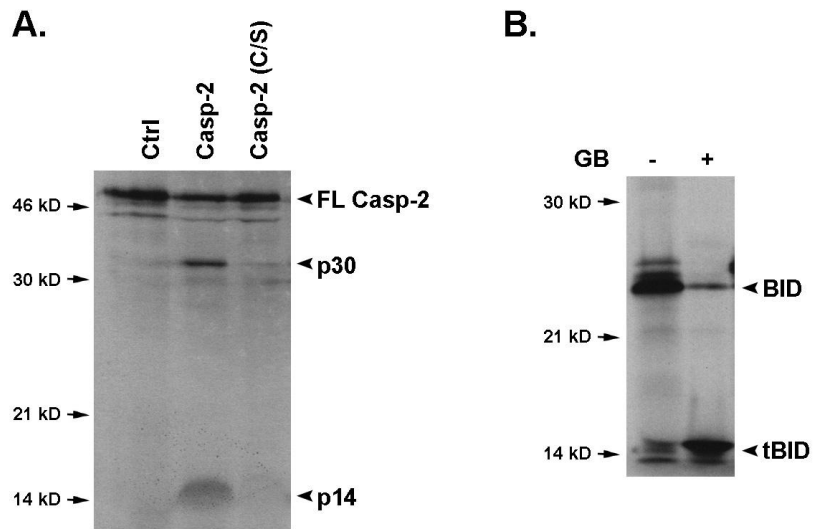

**Supplementary information, Figure S1** The activities of caspase-2 and Granzyme B. **(A)** Caspase-2 activity.  $^{35}\text{S}$ -labeled caspase-2 precursor was incubated with ctrl bacterial lysate, or bacterial lysate expressing either active or inactive caspase-2. The cleavage of full-length caspase-2 was the indicator of caspase-2 activity. **(B)** Granzyme B activity. BID was a good substrate of Granzyme B.
