# Supplementary material
Source: PubMed Central journal article supplement (PMC3641598)
Supplement: cr201336x2.pdf [file cr201336x2.pdf]

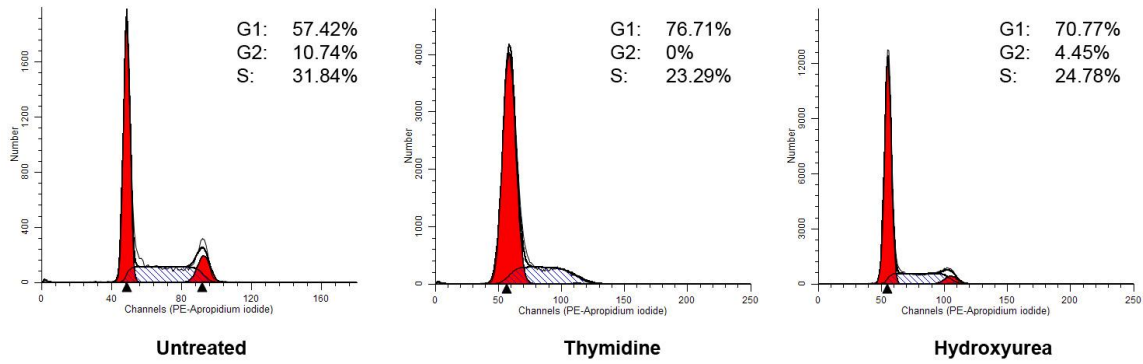

**Supplementary information, Figure S2** Verification of cell cycle arrest induced by treatment of thymidine and hydroxyurea. HeLa cells were treated with thymidine (2 mM) or hydroxyurea (4 mM) for 12 h, and cell cycle profiles were analysis by flow cytometry and ModFit LT software.
